## CORRECTION

# Correction: Ammonia excretion in aquatic invertebrates: new insights and questions (doi: 10.1242/jeb.169219)

**Dirk Weihrauch and Garrett J. P. Allen**

There was an error published in *J. Exp. Biol.* (2018) **221**, jeb169219 (doi: 10.1242/jeb.169219).

The second author's name was incorrectly displayed. The correct version is shown above. This has been corrected in the online full-text and PDF versions.

We apologise to the authors and readers for any inconvenience this may have caused.
